# Supplementary material for: Different regulation of limb development by p63 transcript variants
Source: PubMed Central journal article supplement (PMC5363923; doi:10.1371/journal.pone.0174122), 2017-03-23
Supplement: pone.0174122.s001.pdf [file pone.0174122.s001.pdf]

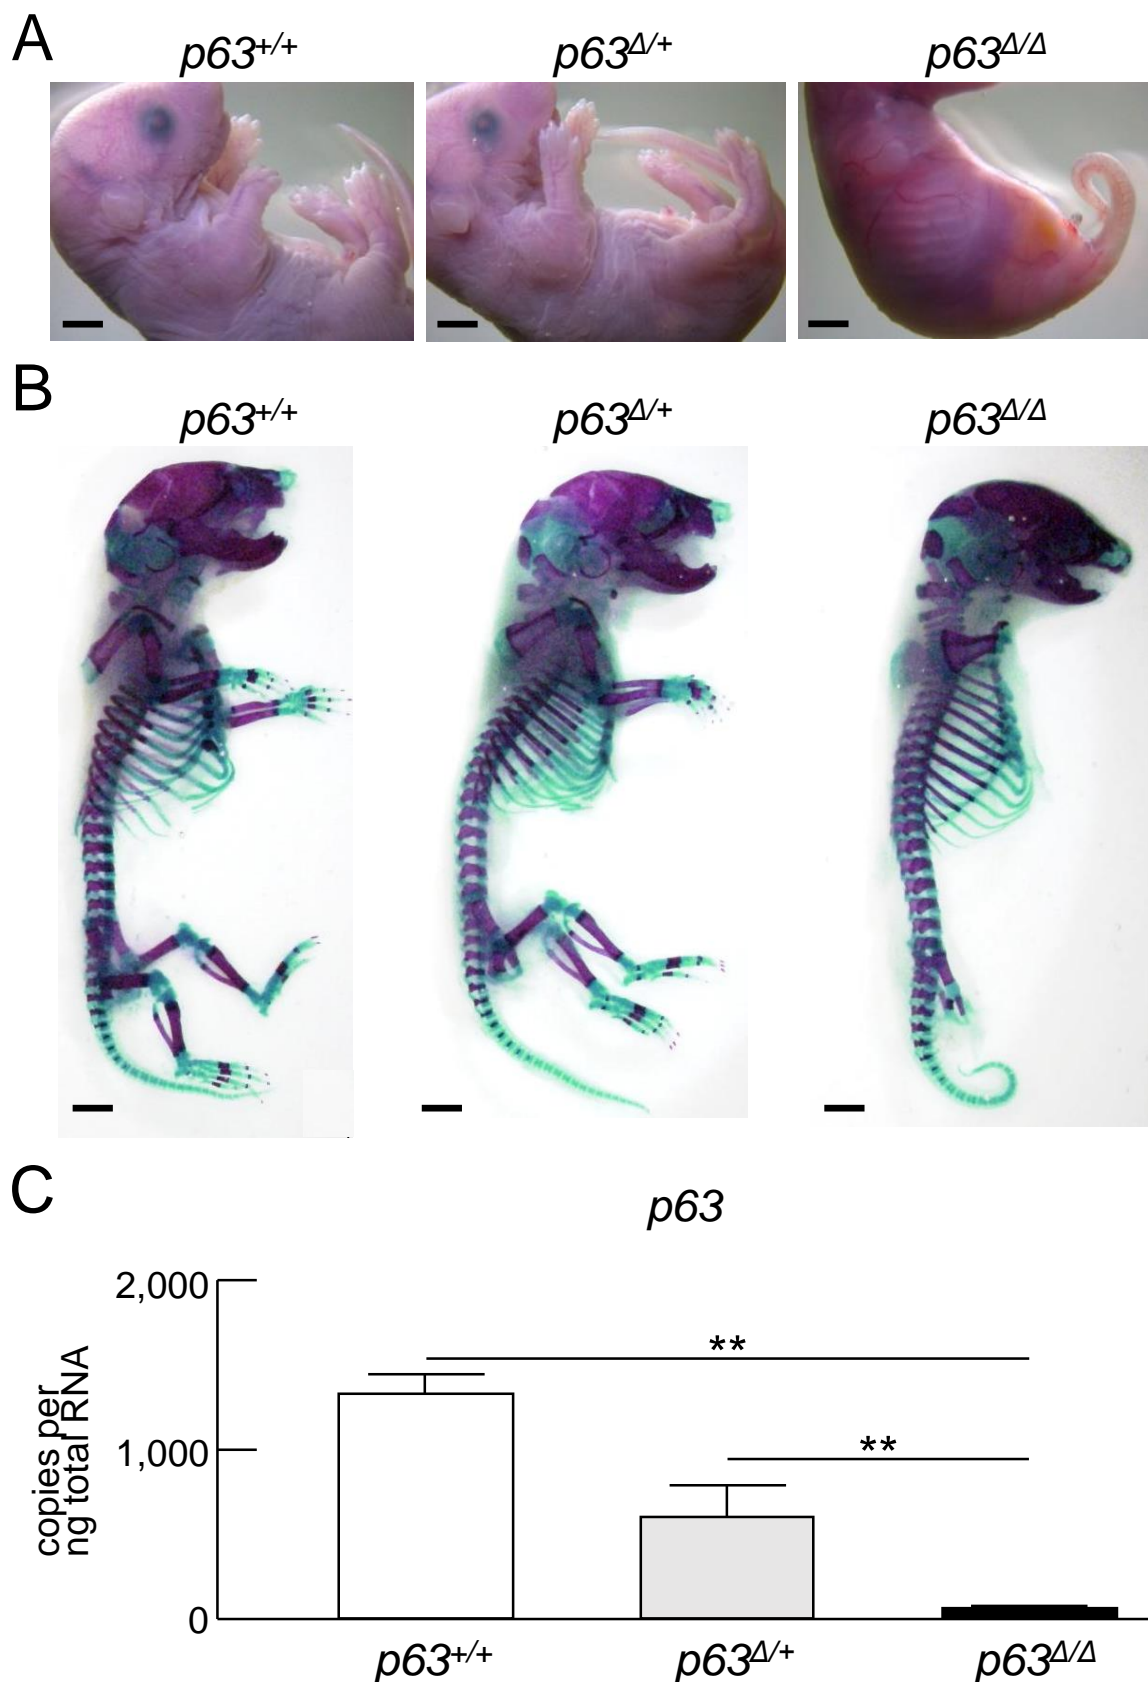

**S1 Fig.  $p63$  knockout mice ( $p63^{\Delta/\Delta}$ ) generated by mating *CAG-Cre* mice with  $p63^{fl/fl}$  mice.** (A) Gross appearances of WT, heterozygous ( $p63^{\Delta/+}$ ), and homozygous ( $p63^{\Delta/\Delta}$ ) mutant E18.5 embryos. Scale bar, 2 mm. Images are representative of  $n = 3$  mice per genotype. (B) Double staining with alizarin red and alcian blue of whole skeletons of WT,  $p63^{\Delta/+}$ , and  $p63^{\Delta/\Delta}$  mutant E18.5 embryos. Scale bar, 2 mm. Images are representative of  $n = 3$  mice per genotype. (C) mRNA levels of  $p63$  in the whole bodies of WT,  $p63^{\Delta/+}$ , and  $p63^{\Delta/\Delta}$  mutant E18.5 embryos. Error bars indicate s.d. ( $n = 3$  biological replicates).  $**P < 0.01$  (unpaired two-tailed Student's  $t$  test).
