# Supplementary material for: Different regulation of limb development by p63 transcript variants
Source: PubMed Central journal article supplement (PMC5363923; doi:10.1371/journal.pone.0174122), 2017-03-23
Supplement: pone.0174122.s002.pdf [file pone.0174122.s002.pdf]

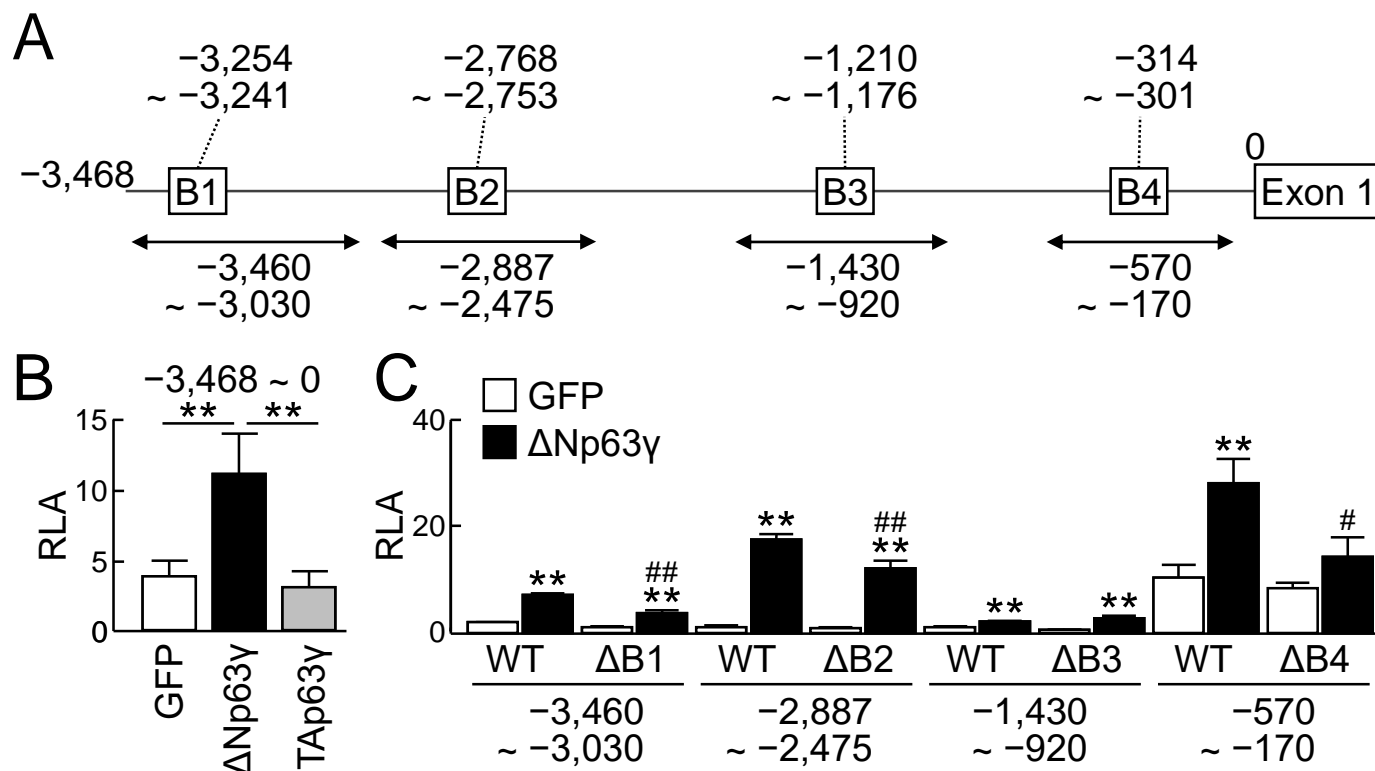

**S2 Fig. Transcriptional regulation of Fgf4 by  $\Delta$ Np63 $\gamma$ .** (A) 5'-end flanking region up to  $-3,468$  bp from the TSS of the mouse Fgf4 gene. Four consensus sequences for p63 binding in this region are shown as B1–4. (B) Luciferase activities in B16 melanoma cells co-transfected with a luciferase reporter gene construct containing a fragment ( $-3,468$  bp to 0 bp) of the Fgf4 gene and an expression vector for GFP,  $\Delta$ Np63 $\gamma$ , or TAp63 $\gamma$ . RLA, relative luciferase activity. Error bars indicate s.d. ( $n = 3$  biological replicates).  $**P < 0.01$  (unpaired two-tailed Student's t test). (C) Luciferase activities in B16 melanoma cells co-transfected with luciferase reporter gene constructs containing the indicated fragments ligated to a miniP and an expression vector for GFP or  $\Delta$ Np63 $\gamma$ . Error bars indicate s.d. ( $n = 3$  biological replicates).  $*P < 0.05$ ,  $**P < 0.01$  vs. GFP.  $\#P < 0.05$ ,  $\##P < 0.01$  vs. WT with  $\Delta$ Np63 $\gamma$  (unpaired two-tailed Student's t test).
