# Supplementary material for: Different regulation of limb development by p63 transcript variants
Source: PubMed Central journal article supplement (PMC5363923; doi:10.1371/journal.pone.0174122), 2017-03-23
Supplement: pone.0174122.s004.pdf [file pone.0174122.s004.pdf]

**S1 Table. List of primers used for genotyping.**

| Allele               | Primer sequences (forward and reverse, 5'-3') |
|----------------------|-----------------------------------------------|
| <i>p63-flox</i>      | AAGTGGCAGTGAGCAGAAC                           |
|                      | ACAATTCCAGTCAAACATCAA                         |
| <i>p63-delta</i>     | TTACTAGGTGCCCACTCTTG                          |
|                      | ACAATTCCAGTCAAACATCAA                         |
| <i>Ai14-mutant</i>   | GGCATTAAAGCAGCGTATCC                          |
|                      | CTGTTCCCTGTACGGCATGG                          |
| <i>Ai14-wildtype</i> | AAGGGAGCTGCAGTGGAGTA                          |
|                      | CCGAAAATCTGTGGGAAGTC                          |
| <i>Prrx1-Cre</i>     | CTCCCTCCTCCTCTCTTGCT                          |
|                      | AGGCAAATTTTGGTGTACGG                          |
| <i>Msx2-Cre</i>      | CCATGCCCTCCGCAGATTTCC                         |
|                      | GTTATTCAACTTGCACCATGC                         |
| <i>CAG-Cre</i>       | CCTACAGCTCCTGGGCAACGTGC                       |
|                      | CTAATCGCCATCTTCCAGCAGG                        |
| <i>CAG-EGFP</i>      | ACGTAAACGGCCACAAGTTC                          |
|                      | GTCCTCCTTGAAGTCGATGC                          |
