# Supplementary material for: Different regulation of limb development by p63 transcript variants
Source: PubMed Central journal article supplement (PMC5363923; doi:10.1371/journal.pone.0174122), 2017-03-23
Supplement: pone.0174122.s005.pdf [file pone.0174122.s005.pdf]

**S2 Table. List of primers used for real-time RT-qPCR.**

| Gene           | Primer sequences (forward and reverse, 5'-3') |
|----------------|-----------------------------------------------|
| <i>β-Actin</i> | AGATGTGGATCAGCAAGCAG                          |
|                | GCGCAAGTTAGGTTTTGTCA                          |
| <i>p63</i>     | TGAGCCGTGAGTTCATGAG                           |
|                | ACCTGTGGTGGCTCATAAGG                          |
| <i>ΔNp63</i>   | CTGGAAAACAATGCCCAGAC                          |
|                | GAGGAGCCGTTCTGAATCTG                          |
| <i>TAp63</i>   | CCCAGAGGTCTTCCAGCATA                          |
|                | TTTTCGGAAGGTTTCATCCAC                         |
| <i>p63α</i>    | ATCTCCTGAGGACCCCAAGT                          |
|                | CTTTGATACGCTGCTGCTTG                          |
| <i>p63β</i>    | GCATTGTCAGGATTTGGCAAG                         |
|                | GTCTCACTGGAGCCCACACT                          |
| <i>p63γ</i>    | GCACACGATCGAAACGTACA                          |
|                | ATTCCTGAAGCAGGCTGAAA                          |
| <i>Fgf8</i>    | TTGGAAGCAGAGTCCGAGTT                          |
|                | TGTGAATACGCAGTCCTTGC                          |
| <i>Fgf4</i>    | GGGTTTGATGTTTCTGCTCTG                         |
|                | CAGTCCATGGGGCTGTCTAT                          |
| <i>Msx1</i>    | CTCTCGGCCATTTCTCAGTC                          |
|                | TACTGCTTCTGGCGGAACTT                          |
| <i>Msx2</i>    | AACACAAGACCAACCGGAAG                          |
|                | GCAGCCATTTTCAGCTTTTC                          |
| <i>Jag2</i>    | CAGATCCGAGTACGCTGTG                           |
|                | GGCTTCTTTGCATTCTTTGC                          |
| <i>Dlx5</i>    | CTGGCCGCTTTACAGAGAAG                          |
|                | CTGGTGACTGTGGCGAGTTA                          |
| <i>Dlx6</i>    | ACCATCGCTTTCAGCAGACT                          |
|                | AGAAACGTCCCACACTGGAG                          |
| <i>Rspo2</i>   | ACCGATGGAGACGCAATAAG                          |
|                | TGCAGGCACTCTCCATACTG                          |
| <i>Prrx1</i>   | GCGGAGAAACAGGACAACAT                          |
|                | ACTTGGCTCTTCGGTTCTGA                          |
