# Supplementary material for: Different regulation of limb development by p63 transcript variants
Source: PubMed Central journal article supplement (PMC5363923; doi:10.1371/journal.pone.0174122), 2017-03-23
Supplement: pone.0174122.s006.pdf [file pone.0174122.s006.pdf]

**S3 Table. List of primers used for ChIP-qPCR.**

| Gene                     | Region | Primer sequences (forward and reverse, 5'-3') |
|--------------------------|--------|-----------------------------------------------|
| <i>Fgf8</i>              | P1     | CATTAGCAGAGGATCGAATGG                         |
|                          |        | TGTACGACCACGAGCAGTTT                          |
|                          | P2     | ATTTCTGGCCTGTTTTCTG                           |
|                          |        | AGAAGGCAAATGTGGATTGG                          |
|                          | P3     | GTGTTTGCAGGAGGGAGTGT                          |
|                          |        | ACAGCCTGGCCACCTTTC                            |
|                          | P4     | TGCAAGATGGGATGCATAAA                          |
|                          |        | AGGCTAAAGAGAGGCAAGCA                          |
|                          | P5     | CTCCCTCCCAGAGCCTCTTT                          |
|                          |        | CGGTGCCTTCACCTTTCTAA                          |
|                          | P6     | GGAAGAGACAGGCAAGGGTA                          |
|                          |        | CAGGGGAGGGGTCTAGGG                            |
|                          | P7     | CCTCCCTCTTCCAAGTGACA                          |
|                          |        | CCTTTCCCCTTCTGAGTTCC                          |
|                          | P8     | GCCCTTTGCATTCTCAACAT                          |
|                          |        | AGAGGAGCAGGGTGCTTTTA                          |
| <i>Jag2</i>              | Q1     | TGCGCTGCCTTATTTTTAGG                          |
|                          |        | CTCCCCGTTACGTTCC                              |
|                          | Q2     | CGCGTGTGCCTTAAGGAGT                           |
|                          |        | CGCCGTAGCCGTAGCTG                             |
|                          | Q3     | CCCTGCAGTTTCCTGGATG                           |
|                          |        | TCTGCCAACACACACAATCA                          |
|                          | Q4     | GCCCTAGGCAGTTACTATTGG                         |
|                          |        | GCCCAAGTGCAGATGACAG                           |
|                          | Q5     | CTGCAGGAAGGAGCATTGT                           |
|                          |        | CGCAGCCTCCTGTTACTTTC                          |
|                          | Q6     | GGCGAGCGAGCTGTCAGT                            |
|                          |        | GTCCTGGCCTCGGCTCT                             |
|                          | Q7     | TGCTTGATCTGCCACAAGTT                          |
|                          |        | GTTCTTGCTGTCCCAGGTA                           |
| Negative control primers |        | TCCTGGGGGTCTACAACAAG                          |
|                          |        | CCACCCCTCCAATCTTACA                           |
